# Supplementary material for: Nutritional parameters and outcomes in patients admitted to intensive care with COVID-19: a retrospective single-centre service evaluation
Source: HighWire-hosted journal article supplement (doi:10.1136/bmjnph-2021-000270), 2021-08-06
Supplement: bmjnph-2021-000270supp001_data_supplement.pdf [file bmjnph-2021-000270supp001_data_supplement.pdf]

|                                      | <b>Survived (n = 48)</b> | <b>Died (n = 24)</b> | <b>P-value</b> |
|--------------------------------------|--------------------------|----------------------|----------------|
| <b>Median Age (IQR)</b>              | 57.0 (50.0 – 62.5)       | 60.0 (59.0 – 65.0)   | 0.064          |
| <b>Male (%)</b>                      | 36 (75.0)                | 18 (75.0)            |                |
| <b>NIDDM (%)</b>                     | 9 (18.8)                 | 10 (41.7)            | 0.038          |
| <b>IDDM (%)</b>                      | 4 (8.3)                  | 3 (12.5)             | 0.574          |
| <b>Mean BMI (SD)</b>                 | 29.5 (5.7)               | 28.2 (4.8)           | 0.321          |
| <b>Admission HbA1c (SD)</b>          | 50.2 (17.0)              | 60.8 (34.7)          | 0.284          |
| <b>Admission Vitamin D (SD)</b>      | 31.7 (16.8)              | 22.7 (10.1)          | 0.116          |
| <b>Insulin Therapy (%)</b>           | 21 (43.8)                | 15 (62.5)            | 0.134          |
| <b>Steroid Therapy (%)</b>           | 8 (16.7)                 | 11 (45.8)            | 0.008          |
| <b>Antibiotic Therapy (%)</b>        | 37 (77.1)                | 22 (91.7)            | 0.129          |
| <b>Pabrinex Therapy (%)</b>          | 14 (29.2)                | 8 (33.3)             | 0.160          |
| <b>Vitamin D Supplementation (%)</b> | 3 (6.3)                  | 4 (16.7)             | 0.164          |
| <b>Median ITU LOS (IQR)</b>          | 25.0 (9.0 – 38.8)        | 13.5 (6.0 – 31.5)    | 0.175          |
| <b>Median ventilator days (IQR)</b>  | 20.0 (12.5 – 34.3)       | 12.0 (6.0 – 30.3)    | 0.190          |
| <b>Median RRT days (IQR)</b>         | 0.0 (0.0 – 9.0)          | 5.0 (0.0 – 10.5)     | 0.276          |
